# Supplementary material for: Relationship of white matter network topology and cognitive outcome in adolescents with d-transposition of the great arteries
Source: PubMed Central journal article supplement — Neuroimage Clin. 2015 Jan 27;7:438–48. doi: 10.1016/j.nicl.2015.01.013 (PMC4318874; doi:10.1016/j.nicl.2015.01.013), 2015-01-27
Supplement: mmc2.pdf [file mmc2.pdf]

**Supplemental Table 1: Mediation: Cognitive difference between d-TGA and referent**

| variable                                   | Total affect p value | Global Efficiency |         |         | Modularity       |        |         | Transitivity     |         |         | small world      |        |         |
|--------------------------------------------|----------------------|-------------------|---------|---------|------------------|--------|---------|------------------|---------|---------|------------------|--------|---------|
|                                            |                      | indirect p value  | a p     | b p     | indirect p value | a p    | b p     | indirect p value | a p     | b p     | indirect p value | a p    | b p     |
| Full-Scale IQ (TGA: 8 yr; Referent: 16 yr) | -0.0775              | ** -0.0068        | -0.0613 | 0.0790  | -0.0062          | 0.0119 | -0.0436 | -0.0670          | -0.2167 | 0.1953  | ** -0.0012       | 0.0265 | -0.0396 |
| WIAT                                       |                      |                   |         |         |                  |        |         |                  |         |         |                  |        |         |
| Word reading                               | -0.0032              | -0.2055           | -0.0613 | 0.5512  | -0.0722          | 0.0119 | -0.2157 | -0.2919          | -0.2167 | 0.7924  | ** -0.0004       | 0.0265 | -0.0257 |
| Reading comprehension                      | -0.0389              | * -0.0368         | -0.0613 | 0.3269  | -0.0464          | 0.0119 | -0.1361 | -0.0484          | -0.2167 | 0.3352  | ** -0.0085       | 0.0265 | -0.1459 |
| Pseudoword decoding                        | -0.0414              | -0.0709           | -0.0613 | 0.3574  | -0.0747          | 0.0119 | -0.2604 | -0.0989          | -0.2167 | 0.5555  | -0.0643          | 0.0265 | -0.1856 |
| Reading composite                          | -0.0132              | -0.0712           | -0.0613 | 0.3877  | -0.0629          | 0.0119 | -0.1919 | -0.0884          | -0.2167 | 0.5354  | ** -0.0032       | 0.0265 | -0.0821 |
| Numerical operations                       | -0.0572              | -0.1255           | -0.0613 | 0.5033  | ** -0.0036       | 0.0119 | -0.0351 | -0.0432          | -0.2167 | 0.4444  | ** -0.0005       | 0.0265 | -0.0192 |
| Math reasoning                             | -0.0492              | -0.3241           | -0.0613 | 0.6798  | -0.0281          | 0.0119 | -0.0705 | -0.2965          | -0.2167 | 0.7429  | ** -0.007        | 0.0265 | -0.0889 |
| Math composite                             | -0.0528              | -0.2518           | -0.0613 | 0.6216  | ** -0.0119       | 0.0119 | -0.0553 | -0.1300          | -0.2167 | 0.5920  | ** -0.0012       | 0.0265 | -0.0342 |
| Spelling (Written Language)                | -0.0022              | -0.2187           | -0.0613 | 0.6168  | -0.0977          | 0.0119 | -0.3337 | 0.9188           | -0.2167 | -0.8302 | ** -0.0008       | 0.0265 | -0.0049 |
| Listening comprehension                    | -0.0205              | -0.1399           | -0.0613 | 0.4897  | -0.0345          | 0.0119 | -0.1331 | -0.4284          | -0.2167 | 0.8219  | ** -0.0001       | 0.0265 | -0.0058 |
| CMS                                        |                      |                   |         |         |                  |        |         |                  |         |         |                  |        |         |
| Dot locations: learning                    | -0.2324              | -0.3681           | -0.0613 | 0.6000  | -0.2810          | 0.0119 | -0.4352 | -0.0440          | -0.2167 | 0.1542  | 0.1726           | 0.0265 | 0.3315  |
| Dot locations: total score                 | -0.1316              | -0.3586           | -0.0613 | 0.6426  | -0.3976          | 0.0119 | -0.5546 | -0.0217          | -0.2167 | 0.1448  | 0.1868           | 0.0265 | 0.3859  |
| Dot locations: long delay                  | -0.3751              | -0.5222           | -0.0691 | 0.8746  | 0.3649           | 0.0140 | 0.4821  | -0.0170          | -0.2338 | 0.1829  | 0.0459           | 0.0306 | 0.1823  |
| Stories: immediate                         | -0.2428              | -0.4990           | -0.0613 | 0.8285  | -0.5714          | 0.0119 | -0.7825 | -0.3021          | -0.2167 | 0.7172  | -0.2142          | 0.0265 | -0.4859 |
| Stories: delayed                           | -0.1584              | 0.6327            | -0.0691 | -0.7471 | 0.6498           | 0.0140 | 0.7186  | -0.4202          | -0.2338 | 0.8408  | -0.8950          | 0.0306 | 0.9681  |
| Stories: delayed recognition               | 0.6319               | 0.0356            | -0.0691 | -0.2177 | -0.9522          | 0.0140 | -0.9597 | 0.4802           | -0.2338 | -0.7165 | -0.7188          | 0.0306 | -0.9095 |

|                                                        |         |            |         |         |            |        |         |         |         |         |            |        |         |
|--------------------------------------------------------|---------|------------|---------|---------|------------|--------|---------|---------|---------|---------|------------|--------|---------|
| Faces: immediate                                       | -0.0184 | ** -0.0031 | -0.0613 | 0.0714  | ** -0.0018 | 0.0119 | -0.0294 | -0.0549 | -0.2167 | 0.0237  | -0.4168    | 0.0265 | -0.6463 |
| Faces: delayed                                         | -0.2669 | -0.0296    | -0.0691 | 0.0008  | ** -0.0011 | 0.0140 | -0.0001 | -0.1639 | -0.2338 | 0.0017  | -0.5392    | 0.0306 | -0.6010 |
| Word Pairs:<br>learning                                | -0.6029 | -0.1719    | -0.0691 | 0.4980  | -0.1829    | 0.0140 | -0.3377 | -0.0309 | -0.2338 | 0.0319  | 0.3462     | 0.0306 | 0.6119  |
| Word Pairs: total<br>score                             | -0.6426 | -0.1510    | -0.0691 | 0.4818  | -0.0910    | 0.0140 | -0.2191 | -0.0171 | -0.2338 | 0.0531  | -0.7444    | 0.0306 | -0.9196 |
| Word Pairs: long<br>delay                              | -0.1827 | -0.5274    | -0.0691 | 0.8820  | 0.8057     | 0.0140 | 0.9539  | -0.0880 | -0.2338 | 0.4265  | -0.2775    | 0.0306 | -0.5837 |
| Word Paired:<br>delayed<br>recognition                 | -0.7618 | -0.4789    | -0.0691 | 0.8019  | -0.4134    | 0.0140 | -0.5161 | -0.3421 | -0.2338 | 0.8197  | -0.2526    | 0.0306 | -0.4354 |
| Numbers: total                                         | -0.0012 | -0.3271    | -0.0613 | 0.7732  | -0.2993    | 0.0119 | -0.4630 | -0.3976 | -0.2167 | 0.9577  | ** -0.0048 | 0.0265 | -0.0900 |
| Sequences: total                                       | -0.1250 | -0.7535    | -0.0691 | -0.8048 | -0.0735    | 0.0140 | -0.1947 | -0.2062 | -0.2338 | 0.7669  | ** -0.002  | 0.0306 | -0.0678 |
| Visual memory<br>immediate                             | -0.0080 | ** -0.008  | -0.0613 | 0.1285  | ** -0.008  | 0.0119 | -0.0633 | -0.0398 | -0.2167 | 0.0103  | 0.6470     | 0.0265 | 0.7742  |
| Visual memory<br>delayed                               | -0.2005 | ** -0.0104 | -0.0691 | 0.0245  | ** -0.0044 | 0.0140 | -0.0386 | -0.0937 | -0.2338 | 0.0040  | 0.3987     | 0.0306 | 0.6394  |
| Verbal memory<br>immediate                             | -0.4087 | -0.3628    | -0.0691 | 0.7206  | -0.3058    | 0.0140 | -0.5141 | -0.0303 | -0.2338 | 0.2075  | -0.6803    | 0.0306 | -0.9410 |
| Verbal memory<br>delayed                               | -0.1093 | -0.7995    | -0.0691 | -0.9350 | 0.7054     | 0.0140 | 0.8264  | -0.1368 | -0.2338 | 0.5378  | -0.4389    | 0.0306 | -0.7455 |
| Attention/Concen<br>tration                            | -0.0077 | -0.6199    | -0.0691 | -0.8814 | -0.2404    | 0.0140 | -0.4047 | -0.3756 | -0.2338 | 0.9773  | ** -0.0041 | 0.0306 | -0.0830 |
| Learning                                               | -0.2877 | -0.0819    | -0.0691 | 0.4206  | -0.0985    | 0.0140 | -0.2392 | -0.0370 | -0.2338 | 0.0219  | 0.1888     | 0.0306 | 0.3938  |
| Delayed<br>recognition                                 | 0.9491  | 0.3987     | -0.0691 | -0.5674 | -0.5379    | 0.0140 | -0.6115 | -0.7825 | -0.2338 | -0.9540 | -0.3202    | 0.0306 | -0.5419 |
| General Memory                                         | -0.0553 | -0.0181    | -0.0691 | 0.2318  | -0.0703    | 0.0140 | -0.2105 | -0.0338 | -0.2338 | 0.0277  | 0.7581     | 0.0306 | 0.8439  |
| DKEFS                                                  |         |            |         |         |            |        |         |         |         |         |            |        |         |
| Verbal Fluency -<br>Letter fluency:<br>total correct   | -0.0064 | -0.2263    | -0.0613 | 0.6159  | ** -0.013  | 0.0119 | -0.0832 | -0.1633 | -0.2167 | 0.5904  | ** -0.0002 | 0.0265 | -0.0166 |
| Verbal Fluency -<br>Category fluency:<br>total correct | -0.0540 | -0.7429    | -0.0613 | 0.9719  | ** -0.0066 | 0.0119 | -0.0255 | -0.1895 | -0.2167 | 0.6292  | ** -0.0008 | 0.0265 | -0.0609 |
| Verbal Fluency -<br>Letter vs.<br>category fluency     | -0.1926 | -0.1950    | -0.0613 | 0.6759  | 0.9283     | 0.0119 | 0.9784  | -0.7278 | -0.2167 | -0.9339 | ** -0.0259 | 0.0265 | -0.1624 |

|                                                          |         |            |         |        |            |        |         |         |         |        |            |         |          |
|----------------------------------------------------------|---------|------------|---------|--------|------------|--------|---------|---------|---------|--------|------------|---------|----------|
| Design Fluency -<br>Total correct:<br>composite scaled   | -0.2876 | ** -0.0037 | -0.0956 | 0.0700 | ** -0.0063 | 0.0128 | -0.0365 | -0.0404 | -0.3004 | 0.0757 | -0.2653    | 0.0214  | -0.4368  |
| Sorting Test -<br>Combined<br>correct sorts              | -0.0913 | -0.3039    | -0.0613 | 0.6149 | -0.0356    | 0.0119 | -0.0950 | -0.4009 | -0.2167 | 0.8087 | ** -0.0296 | 0.02650 | -0.09000 |
| Sorting Test -<br>Combined<br>conditions 1 & 2           | -0.0077 | -0.3212    | -0.0613 | 0.7184 | -0.2356    | 0.0119 | -0.3286 | -0.0345 | -0.2167 | 0.2981 | -0.215     | 0.0265  | -0.4578  |
| Word Context<br>Test - Total<br>consecutively<br>correct | -0.0262 | -0.2560    | -0.0613 | 0.7237 | -0.0808    | 0.0119 | -0.1911 | -0.1694 | -0.2167 | 0.6965 | -0.0356    | 0.0265  | -0.1364  |
| Word Context<br>Test -<br>Consistently<br>correct ratio  | -0.2395 | ** -0.0063 | -0.0613 | 0.1827 | -0.0428    | 0.0119 | -0.0960 | -0.0406 | -0.2167 | 0.3298 | -0.1389    | 0.0265  | -0.2382  |
| Tower Test -<br>Total<br>achievement                     | 0.8508  | -0.1373    | -0.0613 | 0.5402 | ** -0.0156 | 0.0119 | -0.0333 | -0.0564 | -0.2167 | 0.5008 | ** -0.0212 | 0.0265  | -0.1517  |
| Executive<br>Function<br>Summary                         | -0.0128 | -0.0524    | -0.0956 | 0.3170 | ** -0.0086 | 0.0128 | -0.0235 | -0.0179 | -0.3004 | 0.2222 | ** -0.0066 | 0.0214  | -0.0765  |
| TVPS                                                     |         |            |         |        |            |        |         |         |         |        |            |         |          |
| Visual<br>discrimination                                 | -0.2787 | -0.1074    | -0.0613 | 0.4578 | -0.3106    | 0.0119 | -0.4753 | -0.1114 | -0.2167 | 0.5618 | -0.1173    | 0.0265  | -0.2863  |
| Visual memory                                            | 0.7930  | -0.0682    | -0.0613 | 0.3828 | -0.5539    | 0.0119 | -0.6874 | -0.3360 | -0.2167 | 0.6403 | -0.0652    | 0.0265  | -0.2225  |
| Visual spatial-<br>relationships                         | -0.3766 | ** -0.0012 | -0.0613 | 0.1366 | -0.0343    | 0.0119 | -0.1443 | -0.0279 | -0.2167 | 0.3499 | -0.0564    | 0.0265  | -0.336   |
| Visual form-<br>constancy                                | -0.0871 | -0.1178    | -0.0613 | 0.1621 | -0.7129    | 0.0119 | -0.9337 | -0.1984 | -0.2167 | 0.1924 | -0.6628    | 0.0265  | -0.7727  |
| Visual sequential-<br>memory                             | -0.0508 | -0.0880    | -0.0613 | 0.3353 | -0.6498    | 0.0119 | -0.8140 | -0.0794 | -0.2167 | 0.3108 | -0.2784    | 0.0265  | -0.5852  |
| Visual figure-<br>ground                                 | -0.2221 | -0.5864    | -0.0613 | 0.9977 | -0.5700    | 0.0119 | -0.7312 | -0.1651 | -0.2167 | 0.5545 | -0.1585    | 0.0265  | -0.3686  |
| Visual closure                                           | -0.0139 | -0.0873    | -0.0613 | 0.1435 | -0.8823    | 0.0119 | 0.9931  | -0.0926 | -0.2167 | 0.1442 | 0.3441     | 0.0265  | 0.615    |
| Visual-Spatial<br>Summary                                | -0.0619 | -0.0394    | -0.0613 | 0.1733 | -0.3472    | 0.0119 | -0.5582 | -0.0670 | -0.2167 | 0.1973 | -0.1651    | 0.0265  | -0.3921  |
| ROCF                                                     |         |            |         |        |            |        |         |         |         |        |            |         |          |
| Organization                                             | -0.7335 | -0.0590    | -0.0613 | 0.3275 | -0.2041    | 0.0119 | -0.3321 | -0.1105 | -0.2167 | 0.4043 | -0.1802    | 0.0265  | -0.2407  |

|                    |         |            |         |        |            |        |         |         |         |        |            |        |         |
|--------------------|---------|------------|---------|--------|------------|--------|---------|---------|---------|--------|------------|--------|---------|
| Structural element | -0.2088 | ** -0.0008 | -0.0613 | 0.1433 | -0.0761    | 0.0119 | -0.0453 | -0.0453 | -0.2167 | 0.3304 | ** -0.0312 | 0.0265 | -0.2791 |
| Incidental element | -0.0820 | -0.1533    | -0.0613 | 0.1946 | -0.1562    | 0.0119 | -0.0191 | -0.0102 | -0.2167 | 0.15   | -0.3183    | 0.0265 | -0.5574 |
| Organization       | -0.3454 | -0.0517    | -0.0613 | 0.1870 | -0.1280    | 0.0119 | -0.3237 | -0.3942 | -0.2167 | 0.5411 | ** -0.0068 | 0.0265 | -0.0369 |
| Structural element | -0.1815 | ** -0.0003 | -0.0613 | 0.1202 | ** -0.0022 | 0.0119 | -0.0367 | -0.0829 | -0.2167 | 0.4625 | ** -0.0006 | 0.0265 | -0.0071 |
| Incidental element | 0.6460  | -0.2309    | -0.0613 | 0.4405 | -0.3320    | 0.0119 | -0.4615 | -0.2636 | -0.2167 | 0.5228 | -0.2535    | 0.0265 | -0.4933 |
| Organization       | 0.5186  | -0.0190    | -0.0613 | 0.2252 | -0.0771    | 0.0119 | -0.1813 | -0.1822 | -0.2167 | 0.6048 | ** -0.0017 | 0.0265 | -0.0144 |
| Structural element | -0.3981 | ** -0.0057 | -0.0613 | 0.2149 | -0.0290    | 0.0119 | -0.0765 | -0.1211 | -0.2167 | 0.5286 | ** -0.0008 | 0.0265 | -0.0236 |
| Incidental element | 0.2672  | ** -0.0113 | -0.0613 | 0.1750 | -0.1132    | 0.0119 | -0.1795 | -0.0332 | -0.2167 | 0.2764 | -0.1868    | 0.0265 | -0.4126 |
