# Supplementary material for: Relationship of white matter network topology and cognitive outcome in adolescents with d-transposition of the great arteries
Source: PubMed Central journal article supplement — Neuroimage Clin. 2015 Jan 27;7:438–48. doi: 10.1016/j.nicl.2015.01.013 (PMC4318874; doi:10.1016/j.nicl.2015.01.013), 2015-01-27
Supplement: mmc3.pdf [file mmc3.pdf]

**Supplemental Table 2: Mediation: total cooling time at ASO in d-TGA group**

| variable                                   | Global Efficiency |        |         | Modularity       |         |         | Transitivity     |        |         | small world      |         |         |
|--------------------------------------------|-------------------|--------|---------|------------------|---------|---------|------------------|--------|---------|------------------|---------|---------|
|                                            | indirect p value  | a p    | b p     | indirect p value | a p     | b p     | indirect p value | a p    | b p     | indirect p value | a p     | b p     |
| Full-Scale IQ (TGA: 8 yr; Referent: 16 yr) | **0.0002          | 0.0553 | 0.0602  | **0.0000         | -0.1190 | -0.0106 | 0.0922           | 0.1447 | 0.2164  | 0.3381           | -0.9098 | -0.0201 |
| WIAT                                       |                   |        |         |                  |         |         |                  |        |         |                  |         |         |
| Word reading                               | **0.0176          | 0.0553 | 0.2906  | **0.0000         | -0.1190 | -0.0600 | 0.1476           | 0.1447 | 0.4838  | 0.2910           | -0.9098 | -0.0392 |
| Reading comprehension                      | **0.0000          | 0.0553 | 0.1694  | **0.0004         | -0.1190 | -0.0934 | 0.0398           | 0.1447 | 0.2410  | 0.0937           | -0.9098 | -0.1111 |
| Pseudoword decoding                        | **0.0000          | 0.0553 | 0.0479  | **0.0000         | -0.1190 | -0.0544 | 0.0121           | 0.1447 | 0.1251  | 0.0564           | -0.9098 | -0.2813 |
| Reading composite                          | **0.0000          | 0.0553 | 0.1016  | **0.0000         | -0.1190 | -0.0458 | 0.0151           | 0.1447 | 0.1982  | 0.1216           | -0.9098 | -0.0900 |
| Numerical operations                       | **0.0048          | 0.0553 | 0.2195  | **0.0000         | -0.1190 | -0.0078 | 0.0270           | 0.1447 | 0.2762  | 0.3011           | -0.9098 | -0.0261 |
| Math reasoning                             | 0.0658            | 0.0553 | 0.3554  | **0.0000         | -0.1190 | -0.0295 | 0.1943           | 0.1447 | 0.4913  | 0.2034           | -0.9098 | -0.0938 |
| Math composite                             | **0.0132          | 0.0553 | 0.2526  | **0.0000         | -0.1190 | -0.0122 | 0.0728           | 0.1447 | 0.3520  | 0.2135           | -0.9098 | -0.0344 |
| Spelling (Written Language)                | **0.0000          | 0.0553 | 0.0956  | **0.0000         | -0.1190 | -0.0564 | 0.0691           | 0.1447 | 0.3045  | 0.3671           | -0.9098 | -0.0218 |
| Listening comprehension                    | **0.0040          | 0.0553 | 0.2245  | **0.0000         | -0.1190 | -0.0109 | 0.2819           | 0.1447 | 0.4981  | 0.3261           | -0.9098 | -0.0035 |
| CMS                                        |                   |        |         |                  |         |         |                  |        |         |                  |         |         |
| Dot locations: learning                    | **0.0025          | 0.0553 | 0.0993  | **0.0056         | -0.1190 | -0.1131 | 0.0764           | 0.1447 | 0.0347  | -0.1044          | -0.9098 | 0.5260  |
| Dot locations: total                       | **0.0002          | 0.0553 | 0.0992  | **0.0438         | -0.1190 | -0.1960 | 0.0453           | 0.1447 | 0.0212  | -0.1998          | -0.9098 | 0.4879  |
| Dot locations: long delay                  | **0.0001          | 0.0624 | 0.1993  | 0.5619           | -0.1328 | -0.7809 | 0.0288           | 0.1585 | 0.0260  | -0.5445          | -0.9892 | 0.2346  |
| Stories:                                   | 0.5419            | 0.0553 | 0.8087  | 0.2882           | -0.1190 | -0.7431 | 0.7099           | 0.1447 | 0.9216  | 0.1197           | -0.9098 | -0.3503 |
| Stories: delayed                           | 0.8713            | 0.0624 | 0.9631  | -0.7718          | -0.1328 | 0.8043  | 0.7414           | 0.1585 | 0.8521  | -0.4827          | -0.9892 | 0.9707  |
| Stories: delayed recognition               | -0.1568           | 0.0624 | -0.3370 | 0.9219           | -0.1328 | -0.9902 | -0.3854          | 0.1585 | -0.5424 | 0.4557           | -0.9892 | -0.6414 |
| Faces: immediate                           | **0.0086          | 0.0553 | 0.1366  | **0.0000         | -0.1190 | -0.0589 | 0.0541           | 0.1447 | 0.0467  | **0.0000         | -0.9098 | -0.9240 |

|                                                    |          |        |        |          |         |         |         |        |         |         |         |         |
|----------------------------------------------------|----------|--------|--------|----------|---------|---------|---------|--------|---------|---------|---------|---------|
| Faces: delayed                                     | **0.0000 | 0.0624 | 0.0820 | **0.0000 | -0.1328 | -0.0008 | 0.1044  | 0.1585 | 0.0969  | 0.0561  | -0.9892 | -0.3318 |
| Word Pairs:<br>learning                            | 0.4202   | 0.0624 | 0.8381 | 0.6862   | -0.1328 | 0.9845  | 0.1764  | 0.1585 | 0.3646  | 0.0335  | -0.9892 | -0.9564 |
| Word Pairs: total<br>score                         | 0.2784   | 0.0624 | 0.7047 | 0.2436   | -0.1328 | -0.6309 | 0.1835  | 0.1585 | 0.3718  | 0.0047  | -0.9892 | -0.4877 |
| Word Pairs: long<br>delay                          | 0.6171   | 0.0624 | 0.7796 | 0.8745   | -0.1328 | -0.8935 | 0.2722  | 0.1585 | 0.4592  | 0.0250  | -0.9892 | -0.5346 |
| Word Paired:<br>delayed<br>recognition             | **0.0327 | 0.0624 | 0.3047 | **0.0406 | -0.1328 | -0.1827 | 0.6284  | 0.1585 | 0.7917  | 0.2846  | -0.9892 | -0.1478 |
| Numbers: total<br>score                            | 0.0735   | 0.0553 | 0.4192 | 0.0985   | -0.1190 | -0.3293 | 0.1027  | 0.1447 | 0.4586  | 0.0670  | -0.9098 | -0.2268 |
| Sequences: total<br>score                          | 0.1188   | 0.0624 | 0.5381 | **0.0097 | -0.1328 | -0.1999 | 0.0561  | 0.1585 | 0.2857  | 0.1114  | -0.9892 | -0.2683 |
| Visual memory<br>immediate                         | **0.0000 | 0.0553 | 0.0370 | **0.0000 | -0.1190 | -0.0362 | 0.0588  | 0.1447 | 0.0035  | 0.6995  | -0.9098 | 0.6782  |
| Visual memory<br>delayed                           | **0.0000 | 0.0624 | 0.0690 | **0.0000 | -0.1328 | -0.0287 | 0.0615  | 0.1585 | 0.0214  | 0.2543  | -0.9892 | 0.9566  |
| Verbal memory<br>immediate                         | 0.6171   | 0.0624 | 0.9236 | 0.4401   | -0.1328 | -0.8733 | 0.4852  | 0.1585 | 0.6777  | 0.1909  | -0.9892 | -0.6254 |
| Verbal memory<br>delayed                           | 0.5878   | 0.0624 | 0.8251 | -0.8760  | -0.1328 | 0.9583  | 0.2757  | 0.1585 | 0.5392  | 0.3320  | -0.9892 | -0.7045 |
| Attention/Concen<br>tration                        | 0.1100   | 0.0624 | 0.5677 | 0.0667   | -0.1328 | -0.3377 | 0.0847  | 0.1585 | 0.3994  | 0.1006  | -0.9892 | -0.3120 |
| Learning                                           | **0.0000 | 0.0624 | 0.1942 | **0.0274 | -0.1328 | -0.2501 | 0.0284  | 0.1585 | 0.0461  | -0.8823 | -0.9892 | 0.7802  |
| Delayed<br>recognition                             | 0.7339   | 0.0624 | 0.9184 | 0.1670   | -0.1328 | -0.3739 | -0.7293 | 0.1585 | -0.8552 | 0.2247  | -0.9892 | -0.2246 |
| General Memory                                     | **0.0001 | 0.0624 | 0.2113 | **0.0039 | -0.1328 | -0.1927 | 0.0296  | 0.1585 | 0.0643  | 0.3021  | -0.9892 | -0.9725 |
| DKEFS                                              |          |        |        |          |         |         |         |        |         |         |         |         |
| Trail Making Test<br>- Number<br>sequencing        | **0.001  | 0.0553 | 0.0706 | **0.0027 | -0.1190 | -0.0581 | 0.1556  | 0.1447 | 0.1932  | 0.3340  | -0.9098 | -0.1340 |
| Trail Making Test<br>- Letter<br>sequencing        | **0.0000 | 0.0553 | 0.0324 | **0.0000 | -0.1190 | -0.0108 | 0.0305  | 0.1447 | 0.0504  | 0.2348  | -0.9098 | -0.3637 |
| Trail Making Test<br>- Number-letter<br>sequencing | **0.0502 | 0.0553 | 0.3164 | **0.0014 | -0.1190 | -0.1321 | 0.1585  | 0.1447 | 0.3892  | 0.2722  | -0.9098 | -0.1316 |

|                                                                                                  |          |        |         |          |         |         |         |        |         |         |         |         |
|--------------------------------------------------------------------------------------------------|----------|--------|---------|----------|---------|---------|---------|--------|---------|---------|---------|---------|
| Trail Making Test - Number-letter switching vs. visual scanning                                  | -0.5366  | 0.0553 | -0.6931 | -0.9251  | -0.1190 | 0.8714  | -0.5379 | 0.1447 | -0.7473 | 0.1127  | -0.9098 | -0.1364 |
| Trail Making Test - Number-letter switching vs. number sequencing                                | -0.2255  | 0.0553 | -0.3436 | -0.3011  | -0.1190 | 0.5440  | -0.5989 | 0.1447 | -0.5679 | -0.8337 | -0.9098 | 0.8235  |
| Trail Making Test - Number-letter switching vs. letter sequencing                                | **0.0165 | 0.0553 | -0.1293 | **0.0025 | -0.1190 | 0.1469  | -0.1096 | 0.1447 | -0.1460 | 0.3049  | -0.9098 | -0.6426 |
| Trail Making Test - Number-letter switching vs. combined number sequencing and letter sequencing | **0.0179 | 0.0553 | -0.1558 | -0.1002  | -0.1190 | 0.3781  | -0.3597 | 0.1447 | -0.4368 | 0.5961  | -0.9098 | -0.9035 |
| Trail Making Test - Number-letter switching vs. motor speed                                      | **0.0338 | 0.0553 | -0.2232 | **0.0093 | -0.1190 | 0.2623  | -0.1459 | 0.1447 | -0.3715 | -0.7025 | -0.9098 | 0.9447  |
| Verbal Fluency - Letter fluency: total correct                                                   | **0.0000 | 0.0553 | 0.0801  | **0.0014 | -0.1190 | -0.0829 | 0.0231  | 0.1447 | 0.0997  | 0.0059  | -0.9098 | -0.2409 |
| Verbal Fluency - Category fluency: total correct                                                 | 0.1255   | 0.0553 | 0.5178  | **0.0001 | -0.1190 | -0.0551 | 0.1136  | 0.1447 | 0.3732  | 0.0539  | -0.9098 | -0.1544 |
| Verbal Fluency - Letter vs. category fluency                                                     | **0.0000 | 0.0553 | 0.0229  | 0.3843   | -0.1190 | -0.3494 | 0.0482  | 0.1447 | 0.1416  | 0.6556  | -0.9098 | -0.5485 |

|                                                                                          |          |        |        |          |         |         |        |        |        |          |         |         |
|------------------------------------------------------------------------------------------|----------|--------|--------|----------|---------|---------|--------|--------|--------|----------|---------|---------|
| Design Fluency -<br>Total correct:<br>composite scaled                                   | **0.0000 | 0.0553 | 0.0174 | **0.0001 | -0.1190 | -0.0324 | 0.0290 | 0.1447 | 0.0544 | 0.0388   | -0.9098 | -0.4803 |
| Color-Word<br>Interference Test -<br>Primary<br>combined<br>measure;<br>completion times | **0.0000 | 0.0456 | 0.0169 | 0.0588   | -0.0975 | -0.3748 | 0.0777 | 0.1518 | 0.0111 | -0.6980  | -0.8107 | 0.6747  |
| Sorting Test -<br>Combined correct<br>sorts                                              | 0.3106   | 0.0553 | 0.5361 | **0.0000 | -0.1190 | -0.0241 | 0.7535 | 0.1447 | 0.9614 | 0.2937   | -0.9098 | -0.0062 |
| Sorting Test -<br>Combined<br>conditions 1 & 2                                           | **0.0285 | 0.0553 | 0.1929 | **0.0024 | -0.1190 | -0.0625 | 0.0330 | 0.1447 | 0.0778 | 0.0149   | -0.9098 | -0.3602 |
| Twenty Questions<br>Test - Total<br>weighted<br>achievement<br>score                     | **0.0248 | 0.0430 | 0.0696 | **0.0028 | -0.0962 | -0.0652 | 0.1226 | 0.1537 | 0.0798 | 0.1316   | -0.8291 | -0.3140 |
| Word Context<br>Test - Total<br>consecutively<br>correct                                 | **0.0001 | 0.0553 | 0.1353 | **0.0002 | -0.1190 | -0.0517 | 0.0243 | 0.1447 | 0.2116 | 0.0981   | -0.9098 | -0.2230 |
| Word Context<br>Test -<br>Consistently<br>correct ratio                                  | **0.0004 | 0.0553 | 0.0745 | **0.0161 | -0.1190 | -0.1196 | 0.0744 | 0.1447 | 0.1729 | 0.2956   | -0.9098 | -0.5085 |
| Tower Test -<br>Total<br>achievement<br>score                                            | 0.2420   | 0.0553 | 0.6655 | 0.0744   | -0.1190 | -0.2213 | 0.0700 | 0.1447 | 0.4810 | 0.7248   | -0.9098 | -0.6514 |
| Proverbs Test -<br>Total<br>achievement: free<br>inquiry                                 | **0.0436 | 0.0430 | 0.2787 | **0.0001 | -0.0962 | -0.0434 | 0.0661 | 0.1537 | 0.2798 | 0.1789   | -0.8291 | -0.0388 |
| Executive<br>Function<br>Summary                                                         | **0.0000 | 0.0553 | 0.0807 | **0.0000 | -0.1190 | -0.0237 | 0.0098 | 0.1447 | 0.0825 | **0.0000 | -0.9098 | -0.2403 |

|                              |          |        |        |          |         |         |         |        |         |        |         |         |
|------------------------------|----------|--------|--------|----------|---------|---------|---------|--------|---------|--------|---------|---------|
| Visual discrimination        | 0.1173   | 0.0553 | 0.4577 | 0.3513   | -0.1190 | -0.5445 | 0.2793  | 0.1447 | 0.4247  | 0.0260 | -0.9098 | -0.4609 |
| Visual memory                | 0.4284   | 0.0553 | 0.7479 | -0.6965  | -0.1190 | 0.9139  | -0.9219 | 0.1447 | -0.9049 | 0.3011 | -0.9098 | -0.1852 |
| Visual spatial-relationships | **0.0000 | 0.0553 | 0.1056 | **0.0381 | -0.1190 | -0.2212 | 0.0488  | 0.1447 | 0.3695  | 0.1078 | -0.9098 | -0.4450 |
| Visual form-constancy        | 0.4740   | 0.0553 | 0.5828 | 0.6241   | -0.1190 | -0.6588 | 0.4191  | 0.1447 | 0.5583  | 0.2005 | -0.9098 | -0.1709 |
| Visual sequential-memory     | 0.0973   | 0.0553 | 0.3855 | 0.3865   | -0.1190 | -0.4631 | 0.1010  | 0.1447 | 0.3148  | 0.1178 | -0.9098 | -0.2477 |
| Visual figure-ground         | 0.2380   | 0.0553 | 0.5264 | **0.0105 | -0.1190 | -0.2319 | 0.1971  | 0.1447 | 0.4880  | 0.0833 | -0.9098 | -0.1006 |
| Visual closure               | **0.0044 | 0.0553 | 0.1761 | -0.7856  | -0.1190 | 0.8322  | 0.0635  | 0.1447 | 0.3071  | 0.2946 | -0.9098 | -0.7500 |
| Visual-Spatial Summary       | **0.0577 | 0.0553 | 0.2391 | 0.2610   | -0.1190 | -0.4454 | 0.1459  | 0.1447 | 0.3326  | 0.0985 | -0.9098 | -0.1449 |
| ROCF                         |          |        |        |          |         |         |         |        |         |        |         |         |
| Organization                 | 0.6185   | 0.0553 | 0.8238 | 0.8776   | -0.1190 | -0.8172 | 0.2469  | 0.1447 | 0.5899  | 0.3887 | -0.9098 | -0.6642 |
| Structural element           | **0.0000 | 0.0553 | 0.0974 | 0.1150   | -0.1190 | -0.0848 | 0.0095  | 0.1447 | 0.2344  | 0.5118 | -0.9098 | -0.6428 |
| Incidental element           | 0.2993   | 0.0553 | 0.2887 | 0.1556   | -0.1190 | -0.0493 | 0.0412  | 0.1447 | 0.2216  | 0.6241 | -0.9098 | -0.7478 |
| Organization                 | 0.0906   | 0.0553 | 0.3156 | 0.0808   | -0.1190 | -0.2428 | 0.4054  | 0.1447 | 0.6965  | 0.3431 | -0.9098 | -0.0193 |
| Structural element           | **0.0000 | 0.0553 | 0.0917 | **0.0000 | -0.1190 | -0.0329 | 0.0751  | 0.1447 | 0.3904  | 0.3778 | -0.9098 | -0.0136 |
| Incidental element           | 0.0910   | 0.0553 | 0.3330 | 0.2179   | -0.1190 | -0.4238 | 0.3832  | 0.1447 | 0.5267  | 0.4827 | -0.9098 | -0.4999 |
| Organization                 | **0.0432 | 0.0553 | 0.2172 | 0.2593   | -0.1190 | -0.4247 | 0.1664  | 0.1447 | 0.3617  | 0.0812 | -0.9098 | -0.1551 |
| Structural element           | **0.0093 | 0.0553 | 0.1825 | **0.0406 | -0.1190 | -0.1038 | 0.1426  | 0.1447 | 0.4762  | 0.3039 | -0.9098 | -0.0366 |
| Incidental element           | 0.0747   | 0.0553 | 0.2845 | 0.3212   | -0.1190 | -0.3922 | 0.1226  | 0.1447 | 0.4080  | 0.6398 | -0.9098 | -0.5849 |
