# Supplementary material for: Relationship of white matter network topology and cognitive outcome in adolescents with d-transposition of the great arteries
Source: PubMed Central journal article supplement — Neuroimage Clin. 2015 Jan 27;7:438–48. doi: 10.1016/j.nicl.2015.01.013 (PMC4318874; doi:10.1016/j.nicl.2015.01.013), 2015-01-27
Supplement: mmc4.pdf [file mmc4.pdf]

**Supplemental Table 3: Mediation: length of hospital stay (days) in d-TGA group**

| variable                                   | Global Efficiency |        |         | Modularity       |         |         | Transitivity     |        |         | small world      |        |         |
|--------------------------------------------|-------------------|--------|---------|------------------|---------|---------|------------------|--------|---------|------------------|--------|---------|
|                                            | indirect p value  | a p    | b p     | indirect p value | a p     | b p     | indirect p value | a p    | b p     | indirect p value | a p    | b p     |
| Full-Scale IQ (TGA: 8 yr; Referent: 16 yr) | 0.5326            | 0.5232 | 0.0607  | 0.3271           | -0.5341 | -0.0144 | 0.1326           | 0.3666 | 0.1769  | **0.0018         | 0.3045 | -0.0387 |
| WIAT                                       |                   |        |         |                  |         |         |                  |        |         |                  |        |         |
| Word reading                               | 0.1855            | 0.5232 | 0.3395  | 0.3618           | -0.5341 | -0.0610 | 0.1006           | 0.3666 | 0.5671  | **0.0149         | 0.3045 | -0.0180 |
| Reading comprehension                      | 0.3576            | 0.5232 | 0.2035  | 0.4249           | -0.5341 | -0.1257 | 0.0420           | 0.3666 | 0.2397  | **0.0007         | 0.3045 | -0.1615 |
| Pseudoword decoding                        | 0.2846            | 0.5232 | 0.1061  | 0.4342           | -0.5341 | -0.0840 | 0.0370           | 0.3666 | 0.2462  | **0.0023         | 0.3045 | -0.1305 |
| Reading composite                          | 0.2585            | 0.5232 | 0.1737  | 0.4099           | -0.5341 | -0.0789 | 0.0224           | 0.3666 | 0.2812  | **0.0024         | 0.3045 | -0.0795 |
| Numerical operations                       | 0.3381            | 0.5232 | 0.2137  | 0.4202           | -0.5341 | -0.0113 | 0.0771           | 0.3666 | 0.2771  | **0.0131         | 0.3045 | -0.0216 |
| Math reasoning                             | 0.4413            | 0.5232 | 0.3393  | 0.5054           | -0.5341 | -0.0390 | 0.3251           | 0.3666 | 0.4500  | **0.0004         | 0.3045 | -0.1229 |
| Math composite                             | 0.4226            | 0.5232 | 0.2459  | 0.4915           | -0.5341 | -0.0180 | 0.1701           | 0.3666 | 0.3386  | **0.0006         | 0.3045 | -0.0373 |
| Spelling (Written Language)                | 0.2585            | 0.5232 | 0.1586  | 0.3513           | -0.5341 | -0.0874 | 0.1326           | 0.3666 | 0.4126  | **0.0267         | 0.3045 | -0.0140 |
| Listening comprehension                    | 0.3724            | 0.5232 | 0.1432  | 0.4099           | -0.5341 | -0.0080 | 0.0715           | 0.3666 | 0.3213  | **0.0078         | 0.3045 | -0.0089 |
| CMS                                        |                   |        |         |                  |         |         |                  |        |         |                  |        |         |
| Dot locations: learning                    | 0.4485            | 0.5232 | 0.1189  | 0.4377           | -0.5341 | -0.1475 | 0.0722           | 0.3666 | 0.0394  | 0.3261           | 0.3045 | 0.4616  |
| Dot locations: total                       | 0.4342            | 0.5232 | 0.0939  | 0.4473           | -0.5341 | -0.1986 | 0.0612           | 0.3666 | 0.0204  | 0.3649           | 0.3045 | 0.4676  |
| Dot locations: long delay                  | 0.1777            | 0.4308 | 0.2251  | 0.8619           | -0.4197 | -0.7740 | **0.0007         | 0.3120 | 0.0362  | 0.0747           | 0.4124 | 0.3144  |
| Stories: immediate                         | 0.5552            | 0.5232 | 0.8091  | 0.7159           | -0.5341 | -0.8059 | 0.4009           | 0.3666 | 0.8494  | -0.1493          | 0.3045 | -0.5070 |
| Stories: delayed                           | -0.6498           | 0.4308 | -0.9052 | -0.2041          | -0.4197 | 0.6199  | 0.7733           | 0.3120 | 0.8968  | 0.5274           | 0.4124 | 0.7748  |
| Stories: delayed recognition               | -0.1615           | 0.4308 | -0.2448 | -0.2568          | -0.4197 | 0.8092  | -0.2428          | 0.3120 | -0.4917 | 0.7369           | 0.4124 | -0.8297 |
| Faces: immediate                           | 0.5041            | 0.5232 | 0.0972  | 0.3021           | -0.5341 | -0.0257 | 0.0577           | 0.3666 | 0.0376  | -0.2576          | 0.3045 | -0.7089 |

|                                  |         |        |         |         |         |         |          |        |         |          |        |         |
|----------------------------------|---------|--------|---------|---------|---------|---------|----------|--------|---------|----------|--------|---------|
| Faces: delayed                   | 0.2919  | 0.4308 | 0.0819  | 0.1280  | -0.4197 | -0.0005 | **0.0067 | 0.3120 | 0.1034  | -0.1092  | 0.4124 | -0.2399 |
| Word Pairs: learning             | 0.4134  | 0.4308 | 0.7682  | -0.3068 | -0.4197 | -0.9697 | **0.0032 | 0.3120 | 0.3292  | 0.4179   | 0.4124 | -0.9962 |
| Word Pairs: total score          | 0.3222  | 0.4308 | 0.6631  | 0.8088  | -0.4197 | -0.5622 | **0.0117 | 0.3120 | 0.3551  | -0.4461  | 0.4124 | -0.4544 |
| Word Pairs: long delay           | 0.4877  | 0.4308 | 0.8232  | -0.8196 | -0.4197 | -0.8033 | 0.0771   | 0.3120 | 0.4901  | -0.4521  | 0.4124 | -0.4417 |
| Word Paired: delayed recognition | 0.4508  | 0.4308 | 0.2978  | 0.1544  | -0.4197 | -0.1658 | 0.5300   | 0.3120 | 0.7617  | -0.3301  | 0.4124 | -0.1394 |
| Numbers: total score             | 0.2113  | 0.5232 | 0.3872  | 0.3909  | -0.5341 | -0.3118 | 0.0428   | 0.3666 | 0.3914  | **0.0163 | 0.3045 | -0.2928 |
| Sequences: total score           | 0.5118  | 0.4308 | 0.7938  | 0.4889  | -0.4197 | -0.2985 | 0.2027   | 0.3120 | 0.4780  | -0.0667  | 0.4124 | -0.1763 |
| Visual memory immediate          | 0.4927  | 0.5232 | 0.0282  | 0.4156  | -0.5341 | -0.0227 | 0.0744   | 0.3666 | 0.0030  | 0.7703   | 0.3045 | 0.7956  |
| Visual memory delayed            | 0.2048  | 0.4308 | 0.0744  | 0.1031  | -0.4197 | -0.0224 | **0.0037 | 0.3120 | 0.0269  | -0.8682  | 0.4124 | -0.8616 |
| Verbal memory immediate          | 0.5714  | 0.4308 | 0.9064  | -0.7218 | -0.4197 | -0.8694 | 0.1516   | 0.3120 | 0.6464  | -0.5823  | 0.4124 | -0.6827 |
| Verbal memory delayed            | 0.7414  | 0.4308 | 0.9388  | -0.2722 | -0.4197 | 0.8974  | 0.1331   | 0.3120 | 0.5955  | -0.6774  | 0.4124 | -0.7470 |
| Attention/Concentration          | 0.2696  | 0.4308 | 0.6902  | 0.4413  | -0.4197 | -0.4038 | 0.1006   | 0.3120 | 0.4883  | -0.0880  | 0.4124 | -0.2882 |
| Learning                         | 0.2225  | 0.4308 | 0.1920  | 0.5209  | -0.4197 | -0.2700 | **0.0043 | 0.3120 | 0.0436  | 0.4202   | 0.4124 | 0.7058  |
| Delayed recognition              | -0.6426 | 0.4308 | -1.0000 | 0.5498  | -0.4197 | -0.4382 | -0.6965  | 0.3120 | -0.8401 | -0.4156  | 0.4124 | -0.2765 |
| General Memory                   | 0.2309  | 0.4308 | 0.2231  | 0.2965  | -0.4197 | -0.1796 | **0.0023 | 0.3120 | 0.0710  | 0.9394   | 0.4124 | -0.9130 |

DKEFS

|                                              |        |        |        |        |         |         |          |        |        |          |        |         |
|----------------------------------------------|--------|--------|--------|--------|---------|---------|----------|--------|--------|----------|--------|---------|
| Trail Making Test - Number sequencing        | 0.6087 | 0.5232 | 0.0967 | 0.4077 | -0.5341 | -0.0865 | 0.1971   | 0.3666 | 0.2071 | **0.025  | 0.3045 | -0.1770 |
| Trail Making Test - Letter sequencing        | 0.3799 | 0.5232 | 0.0362 | 0.3320 | -0.5341 | -0.0188 | **0.0122 | 0.3666 | 0.0480 | -0.1305  | 0.3045 | -0.4440 |
| Trail Making Test - Number-letter sequencing | 0.3843 | 0.5232 | 0.1250 | 0.3660 | -0.5341 | -0.0506 | 0.0356   | 0.3666 | 0.1748 | **0.0022 | 0.3045 | -0.1877 |

|                                                                                                  |         |        |         |         |         |         |         |        |         |            |        |         |
|--------------------------------------------------------------------------------------------------|---------|--------|---------|---------|---------|---------|---------|--------|---------|------------|--------|---------|
| Trail Making Test - Number-letter switching vs. visual scanning                                  | -0.5261 | 0.5232 | -0.7905 | -0.4839 | -0.5341 | -0.9920 | -0.4508 | 0.3666 | -0.8874 | ** -0.0002 | 0.3045 | -0.1704 |
| Trail Making Test - Number-letter switching vs. number sequencing                                | 0.6017  | 0.5232 | -0.7539 | 0.7010  | -0.5341 | 0.9824  | 0.4889  | 0.3666 | -0.9357 | -0.9761    | 0.3045 | 0.8428  |
| Trail Making Test - Number-letter switching vs. letter sequencing                                | -0.4191 | 0.5232 | -0.3928 | -0.4366 | -0.5341 | 0.4917  | -0.1211 | 0.3666 | -0.3606 | -0.0836    | 0.3045 | -0.5873 |
| Trail Making Test - Number-letter switching vs. combined number sequencing and letter sequencing | -0.6059 | 0.5232 | -0.3814 | 0.9077  | -0.5341 | 0.8438  | 0.8134  | 0.3666 | -0.7676 | -0.3493    | 0.3045 | -0.8888 |
| Trail Making Test - Number-letter switching vs. motor speed                                      | -0.3713 | 0.5232 | -0.4740 | -0.3544 | -0.5341 | 0.5465  | -0.2301 | 0.3666 | -0.6155 | -0.8415    | 0.3045 | 0.9763  |
| Verbal Fluency - Letter fluency: total correct                                                   | 0.3493  | 0.5232 | 0.1088  | 0.4214  | -0.5341 | -0.0986 | 0.0259  | 0.3666 | 0.1131  | ** -0.0105 | 0.3045 | -0.2688 |
| Verbal Fluency - Category fluency: total correct                                                 | 0.8196  | 0.5232 | 0.7281  | 0.4927  | -0.5341 | -0.1084 | 0.3077  | 0.3666 | 0.5282  | ** -0.0028 | 0.3045 | -0.1397 |
| Verbal Fluency - Letter vs. category fluency                                                     | 0.3639  | 0.5232 | 0.0787  | 0.3618  | -0.5341 | -0.5148 | 0.0585  | 0.3666 | 0.2289  | -0.4099    | 0.3045 | -0.6772 |

|                                                                                          |        |        |        |         |         |         |          |        |        |            |        |         |
|------------------------------------------------------------------------------------------|--------|--------|--------|---------|---------|---------|----------|--------|--------|------------|--------|---------|
| Design Fluency -<br>Total correct:<br>composite scaled<br>score                          | 0.4802 | 0.5232 | 0.0141 | 0.3241  | -0.5341 | -0.0318 | 0.0410   | 0.3666 | 0.0565 | ** -0.0188 | 0.3045 | -0.3351 |
| Color-Word<br>Interference Test -<br>Primary<br>combined<br>measure;<br>completion times | 0.7688 | 0.5579 | 0.0273 | 0.4377  | -0.5795 | -0.4022 | 0.1764   | 0.3822 | 0.0220 | -0.2294    | 0.2528 | -0.8992 |
| Sorting Test -<br>Combined<br>correct sorts                                              | 0.4978 | 0.5232 | 0.5417 | 0.4449  | -0.5341 | -0.0360 | -0.8010  | 0.3666 | 0.9520 | -0.0364    | 0.3045 | -0.0069 |
| Sorting Test -<br>Combined<br>conditions 1 & 2                                           | 0.4581 | 0.5232 | 0.2763 | 0.5552  | -0.5341 | -0.1211 | 0.0359   | 0.3666 | 0.0984 | -0.0607    | 0.3045 | -0.4694 |
| Twenty<br>Questions Test -<br>Total weighted<br>achievement                              | 0.7248 | 0.5687 | 0.1289 | 0.3421  | -0.5776 | -0.1028 | 0.1114   | 0.3603 | 0.1137 | -0.0895    | 0.2713 | -0.3380 |
| Word Context<br>Test - Total<br>consecutively<br>correct                                 | 0.3493 | 0.5232 | 0.1499 | 0.4179  | -0.5341 | -0.0586 | 0.0338   | 0.3666 | 0.2290 | ** -0.0028 | 0.3045 | -0.1975 |
| Word Context<br>Test -<br>Consistently<br>correct ratio                                  | 0.2172 | 0.5232 | 0.0617 | 0.2748  | -0.5341 | -0.0753 | **0.0106 | 0.3666 | 0.1642 | -0.1305    | 0.3045 | -0.3533 |
| Tower Test -<br>Total<br>achievement                                                     | 0.1410 | 0.5232 | 0.4550 | 0.2619  | -0.5341 | -0.1024 | **0.0127 | 0.3666 | 0.3773 | -0.0498    | 0.3045 | -0.4506 |
| Proverbs Test -<br>Total<br>achievement:<br>free inquiry                                 | 0.5782 | 0.5687 | 0.2607 | 0.4740  | -0.5776 | -0.0376 | 0.0502   | 0.3603 | 0.2542 | ** -0.0012 | 0.2713 | -0.0358 |
| Executive<br>Function<br>Summary                                                         | 0.3281 | 0.5232 | 0.0909 | 0.3920  | -0.5341 | -0.0269 | **0.012  | 0.3666 | 0.0940 | ** -0.0031 | 0.3045 | -0.2025 |
| TVPS<br>Visual<br>discrimination                                                         | 0.4678 | 0.5232 | 0.6869 | -0.6270 | -0.5341 | -0.8922 | 0.1998   | 0.3666 | 0.6603 | -0.2202    | 0.3045 | -0.3109 |

|                              |        |        |        |         |         |         |          |        |        |            |        |         |
|------------------------------|--------|--------|--------|---------|---------|---------|----------|--------|--------|------------|--------|---------|
| Visual memory                | 0.2810 | 0.5232 | 0.5913 | 0.7718  | -0.5341 | -0.8700 | 0.5170   | 0.3666 | 0.9555 | -0.0561    | 0.3045 | -0.1523 |
| Visual spatial-relationships | 0.4496 | 0.5232 | 0.0443 | 0.2644  | -0.5341 | -0.0982 | 0.1114   | 0.3666 | 0.2615 | -0.0418    | 0.3045 | -0.2634 |
| Visual form-constancy        | 0.4389 | 0.5232 | 0.7063 | -0.4545 | -0.5341 | -0.8240 | 0.2128   | 0.3666 | 0.6617 | -0.1127    | 0.3045 | -0.1643 |
| Visual sequential-memory     | 0.2793 | 0.5232 | 0.5334 | 0.5313  | -0.5341 | -0.6397 | 0.0271   | 0.3666 | 0.3713 | -0.2325    | 0.3045 | -0.3606 |
| Visual figure-ground         | 0.2436 | 0.5232 | 0.5190 | 0.2428  | -0.5341 | -0.2830 | 0.0895   | 0.3666 | 0.4942 | -0.1146    | 0.3045 | -0.0940 |
| Visual closure               | 0.3281 | 0.5232 | 0.3845 | -0.2202 | -0.5341 | 0.5610  | 0.0895   | 0.3666 | 0.5376 | -0.5782    | 0.3045 | -0.6660 |
| Visual-Spatial Summary       | 0.2593 | 0.5232 | 0.2979 | 0.6643  | -0.5341 | -0.5539 | 0.0709   | 0.3666 | 0.4063 | -0.0640    | 0.3045 | -0.1128 |
| ROCF                         |        |        |        |         |         |         |          |        |        |            |        |         |
| Organization                 | 0.2428 | 0.5232 | 0.6489 | 0.5673  | -0.5341 | -0.7147 | 0.0876   | 0.3666 | 0.5117 | -0.4179    | 0.3045 | -0.5784 |
| Structural element           | 0.2687 | 0.5232 | 0.0645 | 0.3681  | -0.5341 | -0.0473 | **0.0151 | 0.3666 | 0.1873 | -0.0333    | 0.3045 | -0.5232 |
| Incidental element           | 0.3452 | 0.5232 | 0.1642 | 0.2636  | -0.5341 | -0.0166 | **0.0124 | 0.3666 | 0.1456 | -0.0731    | 0.3045 | -0.6110 |
| Organization                 | 0.1888 | 0.5232 | 0.2358 | 0.2217  | -0.5341 | -0.1847 | 0.2910   | 0.3666 | 0.5941 | -0.0635    | 0.3045 | -0.0149 |
| Structural element           | 0.3660 | 0.5232 | 0.0562 | 0.2653  | -0.5341 | -0.0218 | 0.0906   | 0.3666 | 0.3002 | ** -0.011  | 0.3045 | -0.0110 |
| Incidental element           | 0.5144 | 0.5232 | 0.3487 | 0.2644  | -0.5341 | -0.3491 | 0.4715   | 0.3666 | 0.5509 | -0.0981    | 0.3045 | -0.3837 |
| Organization                 | 0.2974 | 0.5232 | 0.2359 | 0.7293  | -0.5341 | -0.4681 | 0.1331   | 0.3666 | 0.3914 | ** -0.0131 | 0.3045 | -0.1298 |
| Structural element           | 0.3597 | 0.5232 | 0.1353 | 0.3998  | -0.5341 | -0.0796 | 0.1802   | 0.3666 | 0.3918 | ** -0.0054 | 0.3045 | -0.0340 |
| Incidental element           | 0.3555 | 0.5232 | 0.2180 | 0.3340  | -0.5341 | -0.2631 | 0.0582   | 0.3666 | 0.3322 | -0.1510    | 0.3045 | -0.5249 |
